# Supplementary material
Source: HighWire-hosted journal article supplement (https://bjgpopen.org/highwire/filestream/4255/field_highwire_adjunct_files/0/BJGPO.2021.0051_Supp.pdf)
Supplement: BJGPO.2021.0051_Supp.pdf [file BJGPO.2021.0051_Supp.pdf]

Supplementary data

| Questions                                                                                      | Response options                                                                                                                                                                                                                                                                                                                                                                                                                                                 |
|------------------------------------------------------------------------------------------------|------------------------------------------------------------------------------------------------------------------------------------------------------------------------------------------------------------------------------------------------------------------------------------------------------------------------------------------------------------------------------------------------------------------------------------------------------------------|
| 1 Where is your current practice?                                                              | Scotland/England/N.Ireland/Wales/Outwith UK                                                                                                                                                                                                                                                                                                                                                                                                                      |
| 2 What is the approximate size of your practice list?                                          | <2000, 2000-4999, 5000-10,000, locum/no fixed practice base                                                                                                                                                                                                                                                                                                                                                                                                      |
| 3. How many years have you been qualified as a GP?                                             | <5years, 5-10 years, 10-20 years, >20years                                                                                                                                                                                                                                                                                                                                                                                                                       |
| 4. Do you have a special interest in Dermatology?                                              | Yes/No                                                                                                                                                                                                                                                                                                                                                                                                                                                           |
| 5 Are you a GP with a Special Interest in Dermatology ( GPWSI)?                                | Yes/No                                                                                                                                                                                                                                                                                                                                                                                                                                                           |
| 6 Do you have other post-graduate training or experience in Dermatology or Plastic Surgery?    | Yes/No                                                                                                                                                                                                                                                                                                                                                                                                                                                           |
| (If Yes, please expand on your experience)                                                     | Free text                                                                                                                                                                                                                                                                                                                                                                                                                                                        |
| 7. Have you currently, or in the past, had any patients with Hidradenitis Suppurativa (HS)?    | Yes/No/ Don't know                                                                                                                                                                                                                                                                                                                                                                                                                                               |
| 8. In the last month, how many patients with HS have you seen?                                 | 0/1-2,3-5, >5                                                                                                                                                                                                                                                                                                                                                                                                                                                    |
| 9. How confident are you about diagnosing HS?                                                  | Very confident - would not need Secondary Care input to diagnose/ Quite confident - could diagnose but might refer to Secondary Care for confirmation /Not very confident - would always refer for confirmation/ Not at all confident of recognising features suggestive of HS                                                                                                                                                                                   |
| 10. How confident are you about treating HS?                                                   | Very confident: would usually manage patient in Primary Care, unless complex or failed treatment<br>Quite confident: happy to manage patient in Primary Care after diagnosis and treatment plan confirmed by Secondary Care (51, 38.3%), Not very confident: regular follow-up in Secondary Care preferred, with Primary Care input between appointments (16, 12.0%), Not at all confident: prefer all management of HS to be in Secondary Care (1, 0.8%), Other |
| 11. To which hospital speciality do you usually refer patients with HS? ( Tick all that apply) | Dermatology/ General Surgery/ Plastic Surgery /Gynaecology/ Specialist Hidradenitis Suppurativa Clinic /Other                                                                                                                                                                                                                                                                                                                                                    |
| 12. What are the biggest influences on your choice of speciality for referral of HS patients?  | List of factors, with respondents rating each very important /somewhat important/ slightly important/ not at all important                                                                                                                                                                                                                                                                                                                                       |
| a)severity of HS                                                                               |                                                                                                                                                                                                                                                                                                                                                                                                                                                                  |
| b) speciality patient previously attended for HS                                               |                                                                                                                                                                                                                                                                                                                                                                                                                                                                  |
| c) patient preference                                                                          |                                                                                                                                                                                                                                                                                                                                                                                                                                                                  |
| d) agreed local pathways                                                                       |                                                                                                                                                                                                                                                                                                                                                                                                                                                                  |
| e) particular skin region involved                                                             |                                                                                                                                                                                                                                                                                                                                                                                                                                                                  |

|                                                                                                                                   |                                                                                                                                                                                                                                                                                                                                  |
|-----------------------------------------------------------------------------------------------------------------------------------|----------------------------------------------------------------------------------------------------------------------------------------------------------------------------------------------------------------------------------------------------------------------------------------------------------------------------------|
| f) awareness of local hospital clinician with interest in HS                                                                      |                                                                                                                                                                                                                                                                                                                                  |
| g) advice from Primary Care colleagues                                                                                            |                                                                                                                                                                                                                                                                                                                                  |
| h) other                                                                                                                          | Free text                                                                                                                                                                                                                                                                                                                        |
| 13. Which medical interventions would you consider trying before hospital referral (tick all that apply)?                         | Lifestyle advice: smoking/ lifestyle advice: weight management/ topical antibiotics and antiseptics/ pain management/ wound care/ 3 month or longer course of tetracycline-type antibiotic/ 3 month or longer course of erythromycin/ 3 month course of clindamycin and rifampicin/ screening for and treating depression/ other |
| 14. Would you perform minor surgery in the practice on a localised HS skin lesion?                                                | Never/ incision and drainage of acutely inflamed lesion/ excision of chronic non-resolving HS nodule/ other                                                                                                                                                                                                                      |
| 15. Do you consider people with HS to be at increased risk of cardiovascular disease or diabetes?                                 | Yes/no/don't know                                                                                                                                                                                                                                                                                                                |
| 16. Do your HS patients get a cardiovascular risk assessment at time of diagnosis?                                                | Yes- in Primary Care/ yes- in Secondary Care/ no - but done opportunistically if attend at later date/ no - not specifically targeted at this patient group /don't know                                                                                                                                                          |
| 17. What proportion of your HS patients get a formal Anxiety/Depression screening?                                                | Nearly all/ Most/ Some/ Few/ None/ Don't know                                                                                                                                                                                                                                                                                    |
| 18. What treatments do you think are most appropriate for pain associated with HS? (tick all that apply)                          | Simple analgesics eg. paracetamol /NSAIDs / opiate drugs /referral for incision and drainage of acutely inflamed lesions/ dressings and other topical treatments /other                                                                                                                                                          |
| 19. How useful would the following services be in supporting you in managing your HS patients ( rate all according to usefulness) | List of services rated: very useful/ quite useful/slightly useful/ not very useful/ not at all useful                                                                                                                                                                                                                            |
| a) More accessible Dermatology services for flares                                                                                |                                                                                                                                                                                                                                                                                                                                  |
| b) Local specialised hidradenitis suppurativa clinic                                                                              |                                                                                                                                                                                                                                                                                                                                  |
| c) Accessible evidence-based guidelines on diagnosing and managing HS                                                             |                                                                                                                                                                                                                                                                                                                                  |
| d) Educational lectures or resources tailored to GP management of HS                                                              |                                                                                                                                                                                                                                                                                                                                  |
| e) Patient support or self-management resources                                                                                   |                                                                                                                                                                                                                                                                                                                                  |
| f) Other                                                                                                                          | Free text                                                                                                                                                                                                                                                                                                                        |

Table S1: Survey questions

| Size of practice vs confidence in managing HS |                                                                     |                                                                                                   |                                                                                                   |                                                                                    | Number of respondents |
|-----------------------------------------------|---------------------------------------------------------------------|---------------------------------------------------------------------------------------------------|---------------------------------------------------------------------------------------------------|------------------------------------------------------------------------------------|-----------------------|
|                                               | Not at all confident: prefer all management of HS by Secondary Care | Not very confident: prefer regular patient follow-up in Secondary Care, with Primary care support | Quite confident: manage patient in Primary Care after diagnosis /treatment plan by Secondary Care | Very confident: manage patient in Primary Care, unless complex or failed treatment |                       |
| >10000                                        | 2.08%                                                               | 8.33%                                                                                             | 27.08%                                                                                            | 62.50%                                                                             | 48                    |
| 5000-10000                                    | 0.00%                                                               | 11.32%                                                                                            | 47.17%                                                                                            | 41.51%                                                                             | 53                    |
| 2000-4999                                     | 0.00%                                                               | 30.00%                                                                                            | 40.00%                                                                                            | 30.00%                                                                             | 20                    |
| < 2000                                        | 0.00%                                                               | 0.00%                                                                                             | 50.00%                                                                                            | 50.00%                                                                             | 4                     |
| no fixed practice base or locum GP            | 0.00%                                                               | 0.00%                                                                                             | 44.44%                                                                                            | 55.56%                                                                             | 9                     |

Table S2

| Years qualified vs confidence in managing HS |                                                                           |                                                                                                                 |                                                                                                                         |                                                                                                  | Number of respondents |
|----------------------------------------------|---------------------------------------------------------------------------|-----------------------------------------------------------------------------------------------------------------|-------------------------------------------------------------------------------------------------------------------------|--------------------------------------------------------------------------------------------------|-----------------------|
|                                              | Not at all confident: prefer all management of HS to be in Secondary Care | Not very confident: regular follow-up in Secondary Care preferred, with Primary Care input between appointments | Quite confident: happy to manage patient in Primary Care after diagnosis and treatment plan confirmed by Secondary Care | Very confident: would usually manage patient in Primary Care, unless complex or failed treatment |                       |
| >20 years                                    | 0.00%                                                                     | 10.29%                                                                                                          | 42.65%                                                                                                                  | 47.06%                                                                                           | 68                    |
| 10 to 20 years                               | 2.78%                                                                     | 5.56%                                                                                                           | 36.11%                                                                                                                  | 55.56%                                                                                           | 36                    |
| 5 to 10 years                                | 0.00%                                                                     | 17.65%                                                                                                          | 35.29%                                                                                                                  | 47.06%                                                                                           | 17                    |
| less than 5 years                            | 0.00%                                                                     | 30.77%                                                                                                          | 30.77%                                                                                                                  | 38.46%                                                                                           | 13                    |

Table S3
